# Supplementary material for: Potentials and Challenges of Genomics for Breeding Cannabis Cultivars
Source: PubMed Central journal article supplement (PMC7546024; doi:10.3389/fpls.2020.573299), 2020-09-25
Supplement: Image_1.pdf [file Image_1.pdf]

Supplementary Material

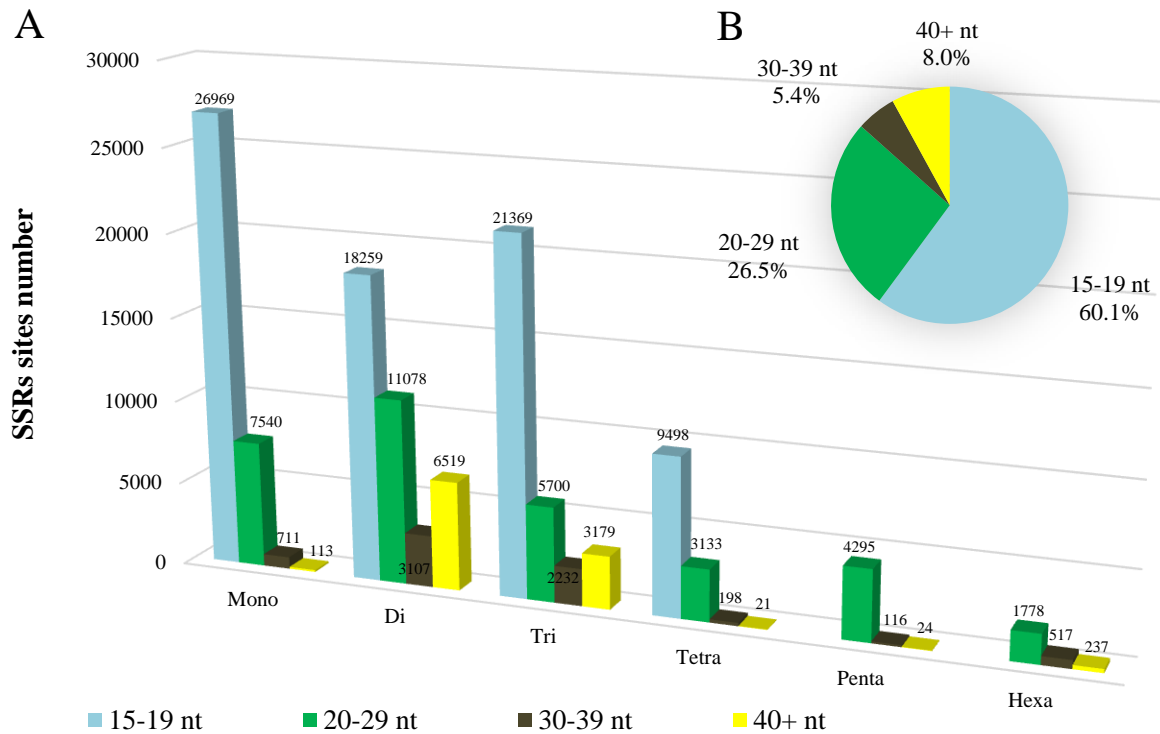

**Supplementary Figure 1** (A) Number of SSRs sites of given lengths among the motifs. (B) Percentage of SSRs sites of the lengths shown (15-19, 20-29, 30-39 and >40 nucleotides) in the whole genome (*C. sativa* cs10 genome).
